# Supplementary material for: Senecavirus a 3D Interacts with NLRP3 to Induce IL-1β Production by Activating NF-κB and Ion Channel Signals
Source: PubMed Central journal article supplement (PMC9045273; doi:10.1128/spectrum.02097-21), 2022-03-07
Supplement: spectrum02097-21_supp_1_seq11.pdf [file spectrum02097-21_supp_1_seq11.pdf]

## Supplemental Figure-1

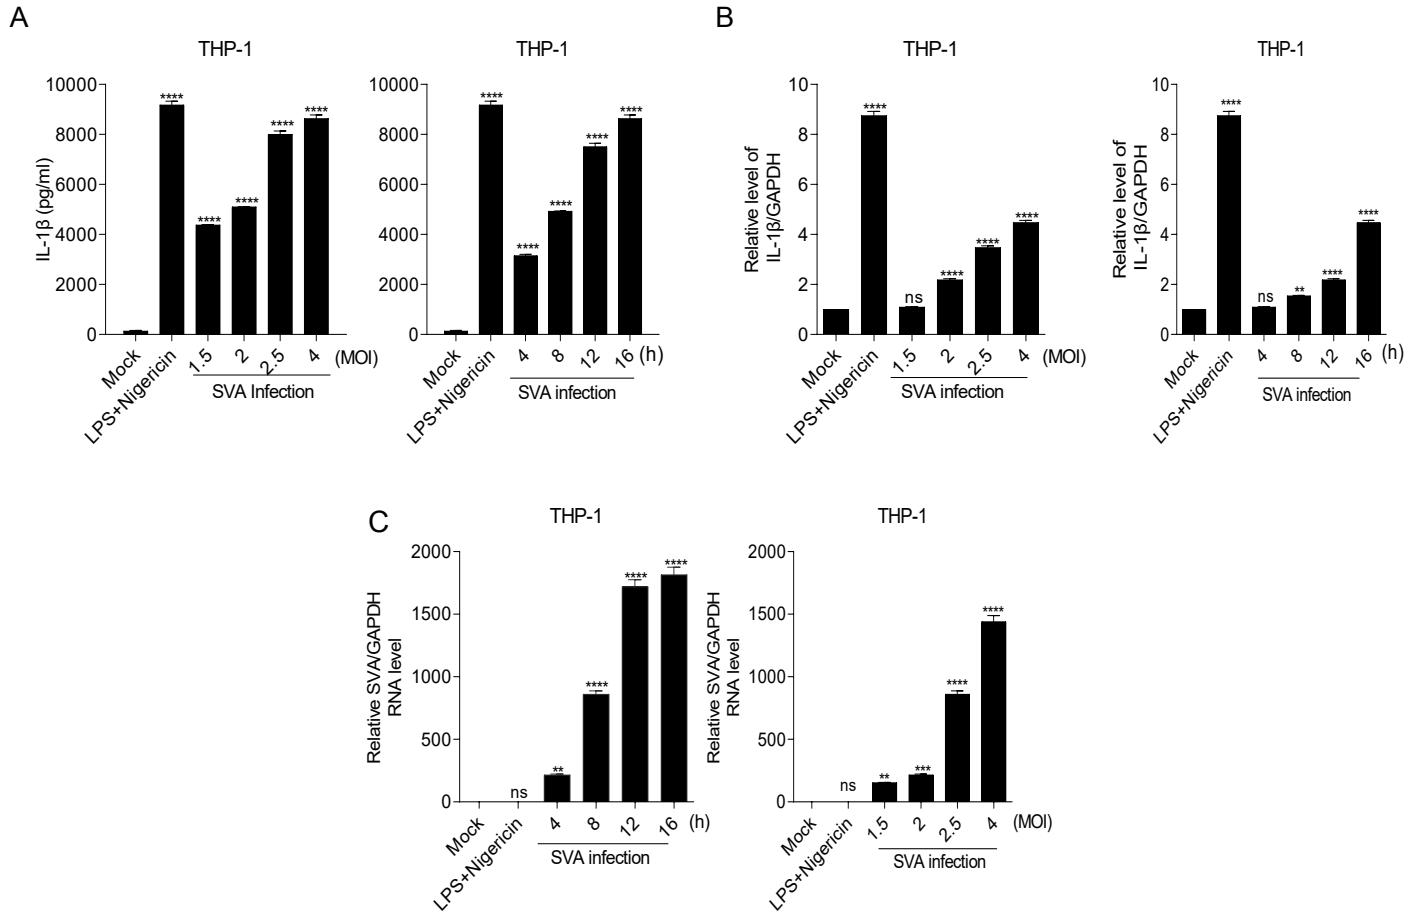

### Supplemental Fig.1 SVA infection induces IL-1 $\beta$ secretion and production.

(A-C) THP-1 cells were treated with 2  $\mu$ M Nigericin for 2 h pre-primed with LPS (60 ng/ml) for 8 h or infected with SVA for 16 h at MOI= 1.5, 2, 2.5, 4, or at MOI=4 for 4, 8, 12, 16 h. The IL-1 $\beta$  levels in the medium were detected by ELISA (A). The IL-1 $\beta$  mRNA levels at the indicated times and MOIs were determined by qPCR (B). The SVA mRNA levels at the indicated times and MOIs were determined by qPCR (C)

## Supplemental Figure-2

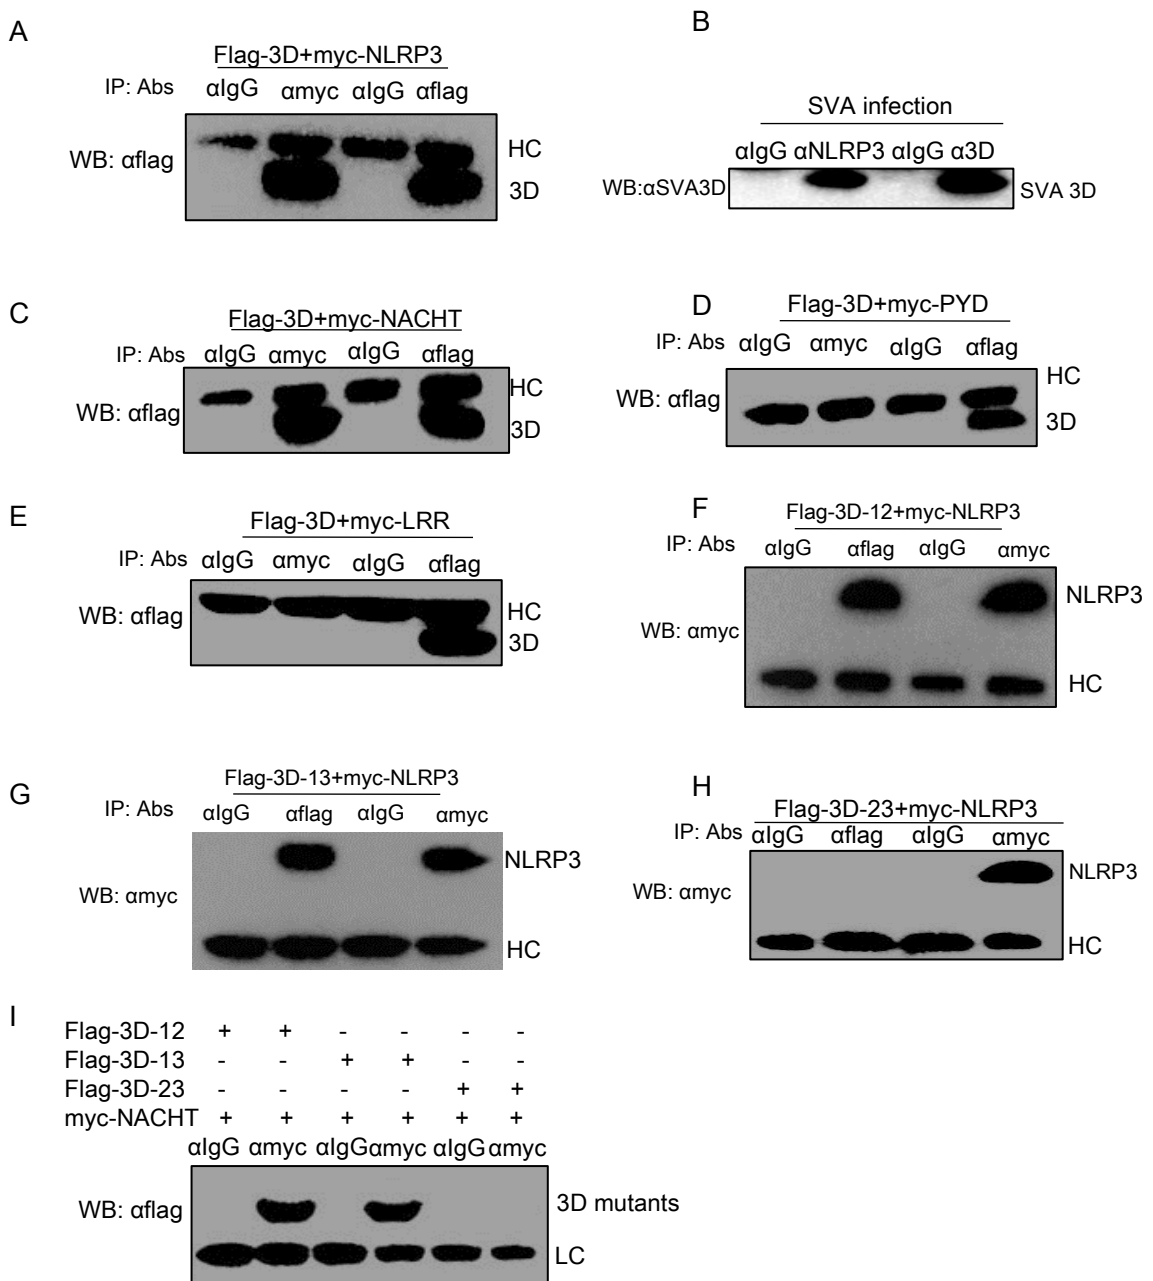

### Supplemental Fig.2 The SVA 3D N-terminus (1-154 amino acids) binds with the NACHT domain of NLRP3 to facilitate NLRP3 inflammasome assembly and activation.

(A, C-E) PK-15 cells were transfected with 5  $\mu$ g Flag-3D along with the 5  $\mu$ g myc-NLRP3, myc-NACHT, myc-PYD, or myc-LRR- the domain of NLRP3. Cell lysates were subjected to IP using IgG, anti-myc, or anti-Flag primary antibody and detected with western blotting using the indicated antibody (WB). (B) PK-15 cells were infected with SVA. Cell lysates were subjected to IP using IgG, anti-NLRP3, or anti-SVA 3D primary antibody and detected with western blotting using the SVA 3D polyclonal antibody (WB). (F-I) 5  $\mu$ g of the SVA 3D deletion mutants (Flag-3D-13, Flag-3D-12, Flag-3D-23) co-expressed with 5  $\mu$ g myc-NLRP3 or myc-NACHT. After 24 h, protein samples were subjected to IP with the indicated antibody and detected by western blotting. After transfection, samples were harvested for 24 hour. For western blot, the antibody dilution ratio was 1: 1000.

### Supplemental Figure- 3

A

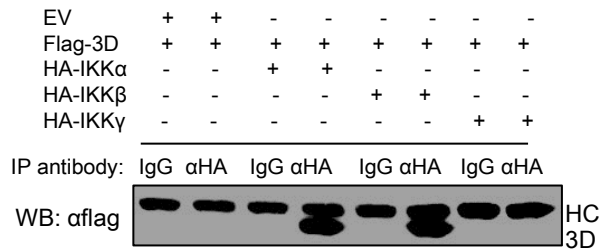

#### Supplemental Fig.3 SVA 3D -induced NLRP3 activation depends on the NF- $\kappa$ B pathway

(A) PK-15 cells were transfected with 5  $\mu$ g Flag-3D along with the 5  $\mu$ g HA-IKK $\alpha$ , HA-IKK $\beta$ , and HA-IKK $\gamma$ . Cell lysates were subjected to IP using IgG, anti-HA, or anti-Flag primary antibody and detected with western blotting using the indicated antibody (WB).

## Supplemental Figure-4

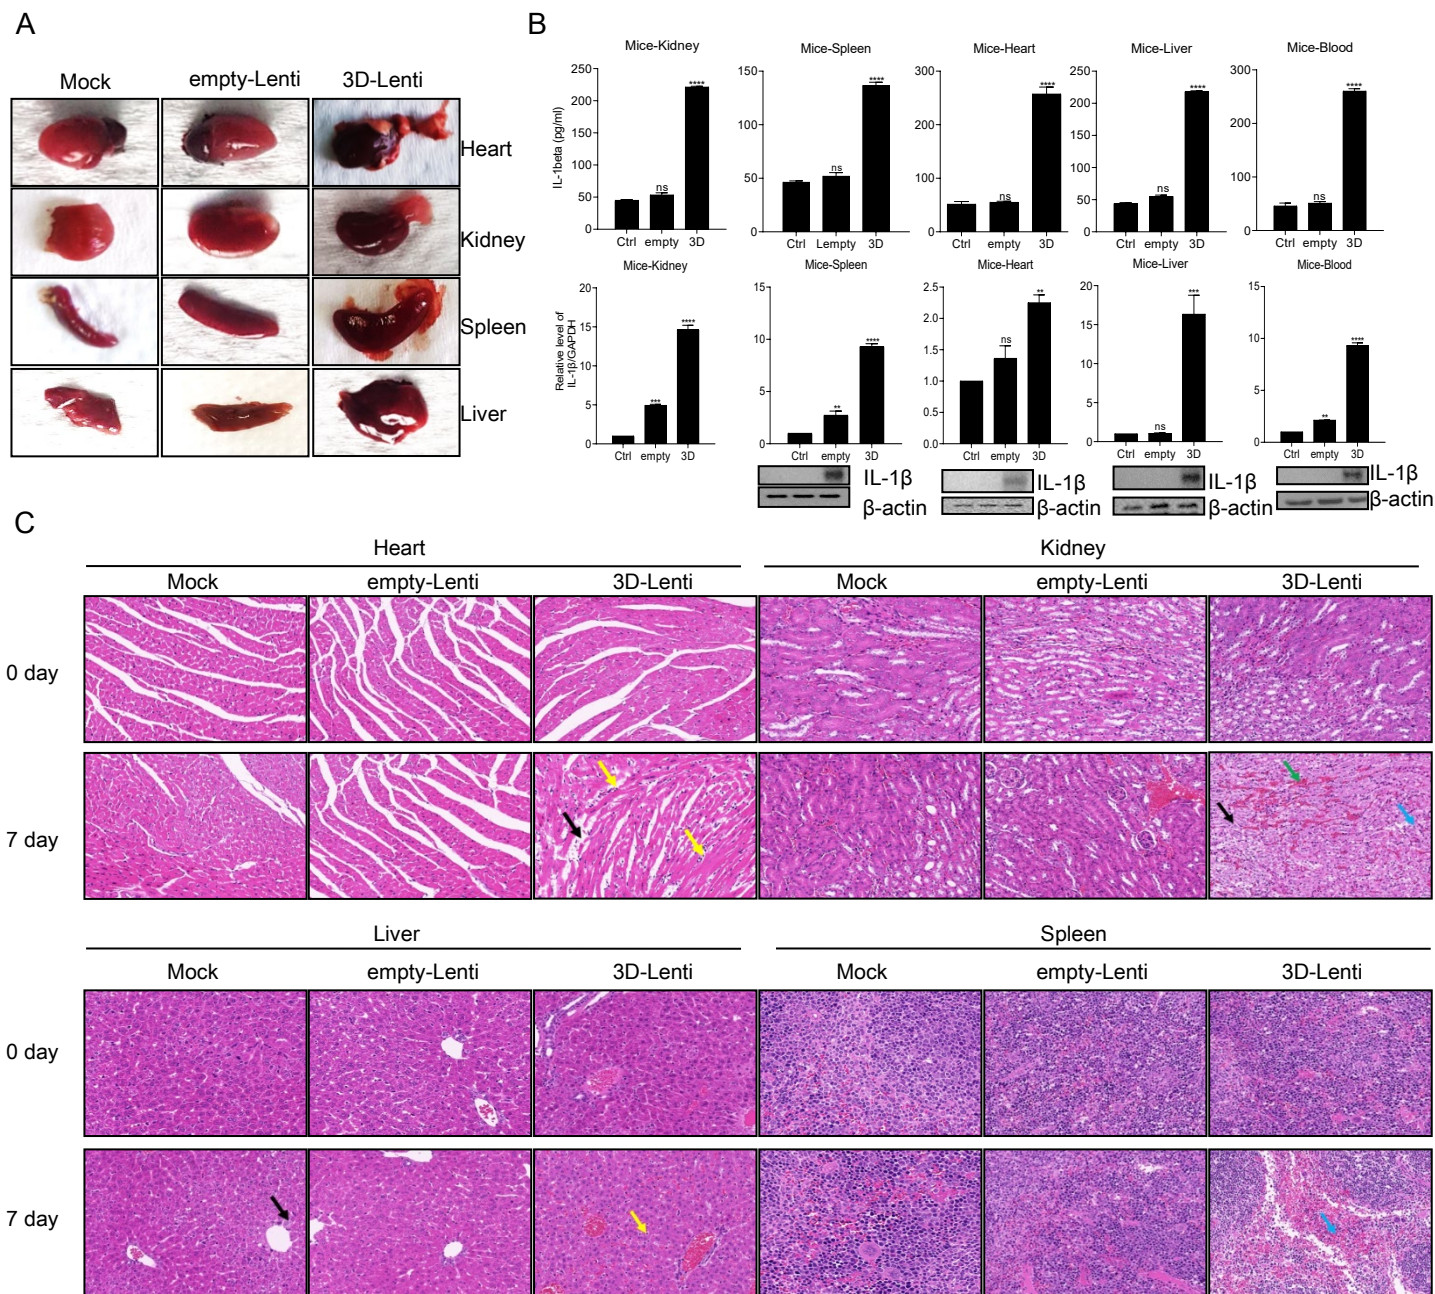

### Supplemental Fig.4 SVA 3D induced an inflammatory response in animals.

(A-C) C57BL/6 mice (60 days old) were treated with DMEM or infected with empty lentivirus ( $1 \times 10^7$  TU/ml) or 3D expression lentivirus ( $1 \times 10^7$  TU/ml) (each of them  $n=3$ ) by tail vein injection for 7 days. The phenotypic changes and histopathological changes (HE staining) of organs were observed (A, C). The levels of IL-1 $\beta$  of the mice organs (blood, liver, kidney, spleen, and heart) were determined by ELISA, qPCR, and western blotting (B).

**Table 1: Primers used in this study for the RT-PCR**

| <b>Genes</b>        | <b>Sense primers (5'-3')</b> | <b>Anti-sense primers (5'-3')</b> |
|---------------------|------------------------------|-----------------------------------|
| hGAPDH-qRT          | GAGTCAACGGATTTGGTCGT         | GACAAGCTTCCCCTTCTCAG              |
| P-GAPDH-qRT         | ACATGGCCTCCAAGGAGTAAGA       | GATCGAGTTGGGGCTGTGACT             |
| mGAPDH-qRT          | CCATGTTTCGTCATGGGTGTGAACCA   | GCCAGTAGAGGCAGGGATGATGTTG         |
| h-p65-qRT           | TGAACCGAAACTCTGGCAGCTG       | CATCAGCTTGCGAAAAGGAGCC            |
| h-IL-1 $\beta$ -qRT | GCAAGGGCTTCAGGCAGGCCGCG      | GGTCATTCTCCTGGAAGGTCTGTGGGC       |
| P-IL-1 $\beta$ -qRT | GACGGGCTTTTGTCTGCTT          | GGACATGGAGAAGCGATTTGT             |
| SVA- qRT            | AGAATTTGGAAGCCATGCTCT        | GAGCCAACATAGARACAGATTGC           |
| m-IL-1 $\beta$ -qRT | GCACTACAGGCTCCGAGATGAAC      | TTGTCGTTGCTTGGTTCTCCTTGT          |
| P-caspase 1-qRT     | GAAATACTCCGAAGAAGTCCCAGA     | GACCCCTTGCTTCTCACCAC              |
| P-PYCARD-qRT        | TCAAGGGTCACAGACGTGGA         | TTGGTGGGGTTGGTGTG                 |
| h-NLRP3-qRT         | AAGGGCCATGGACTATTTCC         | GACTCCACCCGATGACAGTT              |
| h-ASC-qRT           | AACCCAAGCAAGATGCGGAAG        | 5'-TTAGGGCCTGGAGGAGCAAG-3'        |
| h-Casp-1-qRT        | TCCAATAATGCAAGTCAAGCC        | GCTGTACCCCAGATTTGTAGCA            |
| SVA-3D- qRT         | AGAATTTGGAAGCCATGCTCT        | GAGCCAACATAGARACAGATTGC           |

P :porcine, h: human, m:mouse
